# Supplementary material
Source: PubMed Central journal article supplement (PMC2777666)
Supplement: NIHMS157017-supplement-supplementary_figure_1.pdf [file NIHMS157017-supplement-supplementary_figure_1.pdf]

**A****DO11.10 TCR expression levels**

|       |        | $\zeta 0$                 | $\zeta 1$                  | $\zeta 3$                 |
|-------|--------|---------------------------|----------------------------|---------------------------|
| IK+/+ | DN     | 60 +/- 30<br><i>n</i> =4  | 206 +/- 38<br><i>n</i> =10 | 115 +/- 24<br><i>n</i> =7 |
|       | DP     | 49 +/- 12<br><i>n</i> =4  | 74 +/- 10<br><i>n</i> =10  | 38 +/- 7<br><i>n</i> =7   |
|       | CD4 SP | N/A                       | N/A                        | 229 +/- 42<br><i>n</i> =7 |
| IK-/- | DN     | 95 +/- 9<br><i>n</i> =3   | 231 +/- 17<br><i>n</i> =12 | 147 +/- 37<br><i>n</i> =6 |
|       | DP     | 89 +/- 6<br><i>n</i> =3   | 193 +/- 26<br><i>n</i> =12 | 128 +/- 46<br><i>n</i> =6 |
|       | CD4 SP | 133 +/- 29<br><i>n</i> =3 | 249 +/- 21<br><i>n</i> =12 | 289 +/- 61<br><i>n</i> =6 |

**H-Y female TCR expression levels**

|       |        | $\zeta 0$                  | $\zeta 1$                  | $\zeta 3$                 |
|-------|--------|----------------------------|----------------------------|---------------------------|
| IK+/+ | DN     | 168 +/- 36<br><i>n</i> =11 | 151 +/- 13<br><i>n</i> =10 | 118 +/- 35<br><i>n</i> =5 |
|       | DP     | 94 +/- 20<br><i>n</i> =11  | 94 +/- 6<br><i>n</i> =10   | 53 +/- 10<br><i>n</i> =5  |
|       | CD8 SP | N/A                        | 251 +/- 18<br><i>n</i> =10 | 202 +/- 45<br><i>n</i> =5 |
| IK-/- | DN     | 177 +/- 47<br><i>n</i> =6  | 106 +/- 70<br><i>n</i> =5  | 177 +/- 45<br><i>n</i> =4 |
|       | DP     | 138 +/- 31<br><i>n</i> =6  | 77 +/- 25<br><i>n</i> =5   | 79 +/- 28<br><i>n</i> =4  |
|       | CD8 SP | N/A                        | 180 +/- 56<br><i>n</i> =5  | 258 +/- 71<br><i>n</i> =4 |

**B**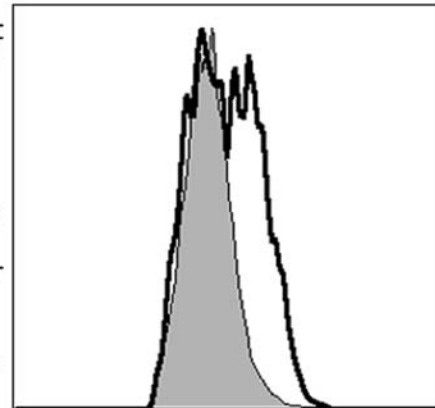

IK-/-  $\zeta 1$  DP  
 IK+/+  $\zeta 1$  DP
