# Supplementary material
Source: PubMed Central journal article supplement (PMC2777666)

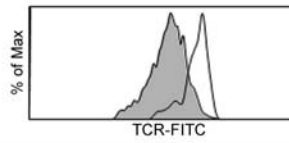

| CD8 SP cells in IK <sup>-/-</sup> DO11.10 ζ1 thymuses |            |          |          |
|-------------------------------------------------------|------------|----------|----------|
| % CD8 SP                                              | # CD8 SP   | TCR MFI  |          |
|                                                       |            | DP       | CD8 SP   |
| 3.5 ± 1.2                                             | 0.1 ± 0.03 | 193 ± 26 | 327 ± 31 |
| n = 16                                                | n = 16     | n = 12   | n = 12   |

Supplement: NIHMS157017-supplement-supplementary_figure_2.pdf [file NIHMS157017-supplement-supplementary_figure_2.pdf]

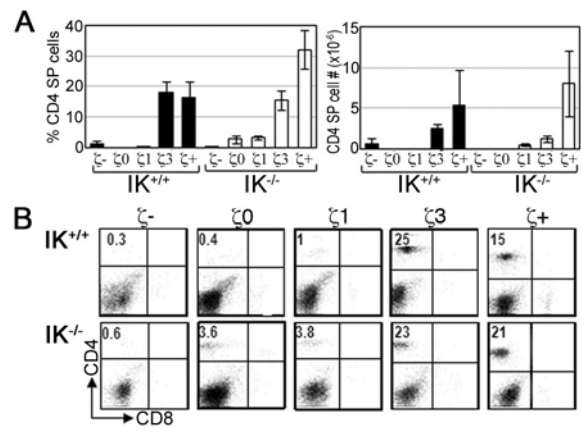

Supplement: NIHMS157017-supplement-supplementary_figure_3.pdf [file NIHMS157017-supplement-supplementary_figure_3.pdf]

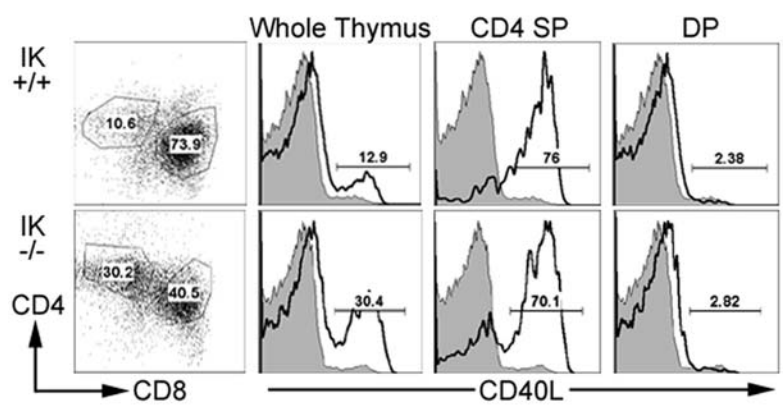

Supplement: NIHMS157017-supplement-supplementary_figure_4.pdf [file NIHMS157017-supplement-supplementary_figure_4.pdf]

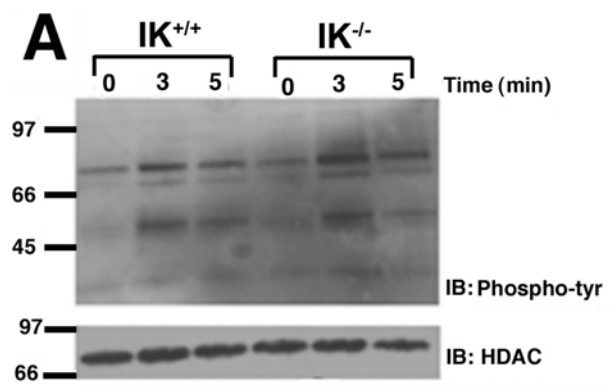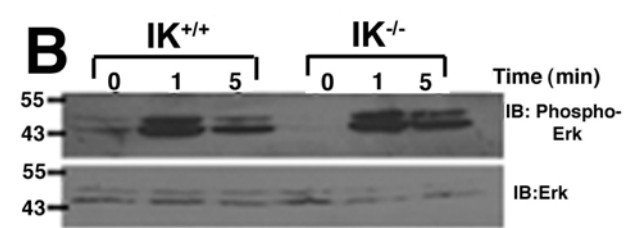

Supplement: NIHMS157017-supplement-supplementary_figure_5.pdf [file NIHMS157017-supplement-supplementary_figure_5.pdf]
